# Supplementary material for: Onychomycosis Caused by Fusarium Species
Source: MDPI journal article supplement (doi:10.3390/jof8040360), 2022-03-31
Supplement: s1 [file s1]

**Supplementary Material****Table S1.** Case reports on the treatment of *Fusarium* spp. onychomycosis.

| Study                | Microorganism | Clinical Presentation | Paronychia | Antifungal Treatments                                                                                                                            | Other antifungal treatments | Clinical Cure | Mycological Cure |
|----------------------|---------------|-----------------------|------------|--------------------------------------------------------------------------------------------------------------------------------------------------|-----------------------------|---------------|------------------|
| Hirose et al., 2020  | FOSC          | PSO                   | Yes        | 10% efinaconazole solution during six months, cure was achieved after 12 months, no recurrence of onychomycosis or paronychia has been detected. | -                           | Achieved      | Achieved         |
| Khurana et al., 2018 | FSSC          | TDO                   | No         | Treated previously with courses of terbinafine, itraconazole, and griseofulvin. No improvement in the appearance of the nail was observed.       | Q-switched Nd-YAG laser     | Achieved      | Achieved         |
| Diongue et al., 2017 | FSSC          | DLSO                  | No         | -                                                                                                                                                | -                           | -             | -                |
| Diongue et al., 2017 | FSSC          | -                     | No         | -                                                                                                                                                | -                           | -             | -                |
| Diongue et al., 2017 | FOSC          | -                     | No         | -                                                                                                                                                | -                           | -             | -                |
| Diongue et al., 2017 | FSSC          | DLSO                  | No         | -                                                                                                                                                | -                           | -             | -                |
| Diongue et al., 2017 | FOSC          | -                     | No         | -                                                                                                                                                | -                           | -             | -                |
| Diongue et al., 2017 | FOSC          | DLSO                  | No         | -                                                                                                                                                | -                           | -             | -                |
| Diongue et al., 2017 | FFSC          | DLSO                  | No         | -                                                                                                                                                | -                           | -             | -                |
| Diongue et al., 2017 | FFSC          | DLSO                  | No         | -                                                                                                                                                | -                           | -             | -                |
| Diongue et al., 2017 | FSSC          | -                     | No         | -                                                                                                                                                | -                           | -             | -                |
| Diongue et al., 2017 | FSSC          | -                     | No         | -                                                                                                                                                | -                           | -             | -                |
| Diongue et al., 2017 | FFSC          | -                     | Yes        | -                                                                                                                                                | -                           | -             | -                |
| Diongue et al., 2017 | FSSC          | -                     | No         | -                                                                                                                                                | -                           | -             | -                |
| Diongue et al., 2017 | FSSC          | -                     | No         | -                                                                                                                                                | -                           | -             | -                |
| Diongue et al., 2017 | FOSC          | DLSO                  | No         | -                                                                                                                                                | -                           | -             | -                |

|                       |      |            |     |                                                                                                                                                                                                                                                                 |                     |              |              |
|-----------------------|------|------------|-----|-----------------------------------------------------------------------------------------------------------------------------------------------------------------------------------------------------------------------------------------------------------------|---------------------|--------------|--------------|
| Diongue et al., 2017  | FFSC | DLSO       | No  | -                                                                                                                                                                                                                                                               | -                   | -            | -            |
| Noguchi et al., 2017  | FFSC | DLSO       | No  | Oral terbinafine for 25.5 months, this treatment did not achieve cure. Then, 3 months of topical application of 10% efinaconazole solution was prescribed.                                                                                                      | -                   | Achieved     | Achieved     |
| Gupta et al., 2016    | FFSC | PSO        | -   | -                                                                                                                                                                                                                                                               | -                   | -            | -            |
| Gupta et al., 2016    | FSSC | PSO        | -   | -                                                                                                                                                                                                                                                               | -                   | -            | -            |
| Gupta et al., 2016    | FSSC | PSO        | -   | -                                                                                                                                                                                                                                                               | -                   | -            | -            |
| Gupta et al., 2016    | FSSC | PSO        | -   | -                                                                                                                                                                                                                                                               | -                   | -            | -            |
| Gupta et al., 2016    | FFSC | DLSO       | -   | -                                                                                                                                                                                                                                                               | -                   | -            | -            |
| Gupta et al., 2016    | FSSC | TDO        | -   | -                                                                                                                                                                                                                                                               | -                   | -            | -            |
| Gupta et al., 2016    | FFSC | DLSO       | -   | -                                                                                                                                                                                                                                                               | -                   | -            | -            |
| Gupta et al., 2016    | FSSC | TDO        | -   | -                                                                                                                                                                                                                                                               | -                   | -            | -            |
| Gupta et al., 2016    | FSSC | PSO        | -   | -                                                                                                                                                                                                                                                               | -                   | -            | -            |
| Gupta et al., 2016    | FSSC | DLSO       | -   | -                                                                                                                                                                                                                                                               | -                   | -            | -            |
| Gupta et al., 2016    | FSSC | PSO        | -   | -                                                                                                                                                                                                                                                               | -                   | -            | -            |
| Al-Hatmi et al., 2015 | FSSC | PSO        | Yes | Initially, itraconazole 200 mg/day, changed to terbinafine 250 mg/day for 2-5 months, without clinical improvement. After molecular identification and anti-fungal susceptibility test, posaconazole 800 mg/day for 1 week each month for 4 months was started. | -                   | Achieved     | Achieved     |
| Ranawaka et al., 2015 | FDSC | DLSO + TDO | Yes | 400 mg/day 7 days/month itraconazole 3 pulses therapy.                                                                                                                                                                                                          | Clotrimazole lotion | Not achieved | Not achieved |
| Ranawaka et al., 2015 | FDSC | TDO        | No  | 500 mg/day 7 days/month terbinafine 2 pulses therapy.                                                                                                                                                                                                           | 3% Thymol in spirit | Achieved     | Achieved     |
| Ranawaka et al., 2015 | FDSC | DLSO + TDO | No  | 400 mg/day 7 days/month itraconazole (2 pulses for fingernails and 3 pulses for toenails).                                                                                                                                                                      | 3% Thymol in spirit | Not achieved | Not achieved |

|                        |                      |            |     |                                                                                                                                                                                                                                                  |                                                                                                                                                                       |              |              |
|------------------------|----------------------|------------|-----|--------------------------------------------------------------------------------------------------------------------------------------------------------------------------------------------------------------------------------------------------|-----------------------------------------------------------------------------------------------------------------------------------------------------------------------|--------------|--------------|
| Ranawaka et al., 2015  | FDSC                 | DLSO       | Yes | 400 mg/day 7 days/month itraconazole 2 pulses therapy.                                                                                                                                                                                           | 3% Thymol in spirit                                                                                                                                                   | Not achieved | Not achieved |
| Ranawaka et al., 2015  | <i>Fusarium</i> spp. | DLSO       | Yes | 400 mg/day 7 days/month itraconazole (2 pulses for fingernails and 3 pulses for toenails).                                                                                                                                                       | 3% Thymol in spirit                                                                                                                                                   | Not achieved | Not achieved |
| Ranawaka et al., 2015  | FOSC                 | DLSO + TDO | Yes | 400 mg/day 7 days/month itraconazole (2 pulses).                                                                                                                                                                                                 | 3% Thymol in spirit                                                                                                                                                   | Not achieved | Not achieved |
| Ranawaka et al., 2015  | FOSC                 | PSO        | Yes | 500 mg/day 7 days/month terbinafine (2 pulses for fingernails and 3 pulses for toenails).                                                                                                                                                        | 3% Thymol in spirit                                                                                                                                                   | -            | -            |
| Ranawaka et al., 2015  | FOSC                 | DLSO       | Yes | 500 mg/day 7 days/month terbinafine (2 pulses for fingernails and 3 pulses for toenails).                                                                                                                                                        | 3% Thymol in spirit                                                                                                                                                   | Not achieved | Not achieved |
| Ranawaka et al., 2015  | FDSC                 | DLSO       | No  | 400 mg/day 7 days/month itraconazole 3 pulses therapy.                                                                                                                                                                                           | 3% Thymol in spirit                                                                                                                                                   | Not achieved | Not achieved |
| Schmidt et al., 2015   | <i>Fusarium</i> spp. | PSO + WSO  | No  | 250 mg/day × 6 weeks terbinafine. After the initial six weeks of therapy, another six weeks of terbinafine was prescribed. The patient had complete clinical resolution of symptoms.                                                             | -                                                                                                                                                                     | Achieved     | -            |
| Ikeda et al., 2014     | FSSC                 | -          | Yes | Initially, 2% ketoconazole cream for 3 weeks, but no improvement was observed. Then, terbinafine 125 mg/day was prescribed. After antifungal susceptibility test, topical 1% butenafine and 1% terbinafine cream was begun, without improvement. | Occlusive dressing therapy of 0.5% amorolfine cream. The nail plate and proximal nail fold were covered with plastic wrap for 8 h/day after application of amorolfine | Achieved     | Achieved     |
| Brasch et al., 2012    | FOSC                 | -          | Yes | Initially, itraconazole 200 mg daily for 10 weeks. The second attempt was itraconazole 400 mg/day for 10 weeks. Then, terbinafine 250 mg/day for 6 weeks. Topical antifungal treatment included amphotericin B.                                  | Topical ciclopirox and polihexanide                                                                                                                                   | -            | -            |
| Kuruvilla et al., 2012 | FSSC                 | SWO        | No  | Itraconazole 200 mg/day for 2 months.                                                                                                                                                                                                            | -                                                                                                                                                                     | Not achieved | Not achieved |
| Ranawaka et al., 2012  | <i>Fusarium</i> spp. | DLSO + TDO | Yes | -                                                                                                                                                                                                                                                | -                                                                                                                                                                     | -            | -            |
| Ranawaka et al., 2012  | <i>Fusarium</i> spp. | DLSO       | No  | -                                                                                                                                                                                                                                                | -                                                                                                                                                                     | -            | -            |
| Brasch et al., 2011    | FFSC                 | DLSO       | No  | 100 mg/day itraconazole and bifonazole for 6 weeks previously; 100 mg/day itraconazole for another 4 weeks without improvement; Terbinafine cream.                                                                                               | Ciclopirox plus partly nail plate remove; Complete nail surgical avulsion; Ciclopirox.                                                                                | Achieved     | -            |
| Gilaberte et al., 2011 | FOSC                 | DLSO       | -   | Initially, oral terbinafine and itraconazole without improvement.                                                                                                                                                                                | Amorolfine and ciclopirox lacquers;                                                                                                                                   | Achieved     | Achieved     |

|                             |                      |      |    |                                                                                                                                                                                                                                                                         |                                                                                      |                                            |          |  |
|-----------------------------|----------------------|------|----|-------------------------------------------------------------------------------------------------------------------------------------------------------------------------------------------------------------------------------------------------------------------------|--------------------------------------------------------------------------------------|--------------------------------------------|----------|--|
|                             |                      |      |    |                                                                                                                                                                                                                                                                         |                                                                                      | Methylaminolevulinate photodynamic therapy |          |  |
| Lurati et al., 2011         | <i>Fusarium</i> spp. | DLSO | No | Application of an amphotericin B solution once daily to the affected nails and surrounding tissue. 1–3 drops of the solution during 23 months.                                                                                                                          | Initially, topical treatment with amorolfine nail lacquer during 6 months            | Achieved                                   | -        |  |
| Lurati et al., 2011         | <i>Fusarium</i> spp. | TDO  | No | Initially, terbinafine 250 mg/day during 3 days. Then, application of an amphotericin B solution once daily to the affected nails and surrounding tissue. 1–3 drops of the solution during 12 months.                                                                   | -                                                                                    | Achieved                                   | -        |  |
| Lurati et al., 2011         | <i>Fusarium</i> spp. | PSO  | No | Application of an amphotericin B solution once daily to the affected nails and surrounding tissue. 1–3 drops of the solution during 12 months.                                                                                                                          | Initially, topical treatment with amorolfine nail lacquer during 6 months - 2 cycles | Achieved                                   | -        |  |
| Lurati et al., 2011         | <i>Fusarium</i> spp. | TDO  | No | Initially, terbinafine 250 mg/day during 3 days. Then, application of an amphotericin B solution once daily to the affected nails and surrounding tissue. 1–3 drops of the solution during 12 months.                                                                   | Nail surgical avulsion and imidazole cream during 2 years.                           | Achieved                                   | -        |  |
| Lurati et al., 2011         | <i>Fusarium</i> spp. | DLSO | No | Initially, terbinafine 250 mg/day during 3 months. Then, application of an amphotericin B solution once daily to the affected nails and surrounding tissue. 1–3 drops of the solution during 12 months.                                                                 | -                                                                                    | Achieved                                   | -        |  |
| Lurati et al., 2011         | <i>Fusarium</i> spp. | DLSO | No | Initially, terbinafine 250 mg/day during 3 months, treatment repeated 2x. Then, Application of an amphotericin B solution once daily to the affected nails and surrounding tissue. 1–3 drops of the solution during 11 months.                                          | -                                                                                    | Achieved                                   | -        |  |
| Park et al., 2011           | FOSC                 | -    | No | Itraconazole 400 mg/day for 1 week followed by no medication for 3 weeks during 6 months.                                                                                                                                                                               | -                                                                                    | Not achieved                               | Achieved |  |
| Yang et al., 2011           | FSSC                 | DLSO | No | Itraconazole 200 mg/day for 3 months.                                                                                                                                                                                                                                   | -                                                                                    | Not achieved                               | -        |  |
| Yang et al., 2011           | FSSC                 | DLSO | No | Terbinafine 250 mg/day for 2 months.                                                                                                                                                                                                                                    | -                                                                                    | Not achieved                               | -        |  |
| Baudraz-Rosset et al., 2010 | FOSC                 | PSO  | No | Initially, itraconazole 200 mg/day 1 week every month during 3 months; Terbinafine 250 mg/day p.o. during 6 months. Then, terbinafine 250 mg/day during 3 months. 6–12 months later, itraconazole pulse therapy 200 mg/day 1 week every month during 3 months.          | Topical treatment with amorolfine and nail drilling.                                 | -                                          | -        |  |
| Baudraz-Rosset et al., 2010 | FOSC                 | DLSO | No | Initially, terbinafine 250 mg/day during 1 week/month, followed by fluconazole 150 mg/week during 3 weeks, for 3 months. Then, terbinafine 250 mg/day during 3 months and, 6–12 months later, itraconazole pulse therapy 200 mg/day 1 week every month during 3 months. | Nail drilling.                                                                       | -                                          | -        |  |

|                               |                      |      |    |                                                                                                                                                                                                                                                                                                                                               |                                                      |              |              |
|-------------------------------|----------------------|------|----|-----------------------------------------------------------------------------------------------------------------------------------------------------------------------------------------------------------------------------------------------------------------------------------------------------------------------------------------------|------------------------------------------------------|--------------|--------------|
| Baudraz-Rosselet et al., 2010 | FOSC                 | DLSO | No | Initially, fluconazole 150 mg/week during 4 months; terbinafine 250 mg/day during 1 week per month, followed by fluconazole 150 mg/week during 3 weeks, for 3 months. Then, terbinafine 250 mg/day during 3 months and, 6–12 months later, itraconazole pulse therapy 200 mg/day 1 week every month during 3 months.                          | Topical treatment with amorolfine and nail drilling. | -            | -            |
| Baudraz-Rosselet et al., 2010 | FFSC                 | PSO  | No | Initially, itraconazole pulse therapy 200 mg/day 1 week every month during 3 months. Then, terbinafine 250 mg/day during 3 months and, 6–12 months later, itraconazole pulse therapy 200 mg/day 1 week every month during 3 months                                                                                                            | Topical treatment with amorolfine.                   | -            | -            |
| Baudraz-Rosselet et al., 2010 | FSSC                 | DLSO | No | Terbinafine 250 mg/day during 3 months                                                                                                                                                                                                                                                                                                        | -                                                    | -            | -            |
| Brasch et al., 2009           | FSSC                 | DLSO | No | -                                                                                                                                                                                                                                                                                                                                             | -                                                    | -            | -            |
| Wu et al., 2009               | FSSC                 | DLSO | No | Itraconazole 400 mg/day                                                                                                                                                                                                                                                                                                                       | -                                                    | Not achieved | Not achieved |
| Hattori et al., 2005          | FFSC                 | DLSO | No | Itraconazole 200 mg/day for 1 week (no medication for 3 weeks) for 6 months.                                                                                                                                                                                                                                                                  | -                                                    | Achieved     | Achieved     |
| Hattori et al., 2005          | FFSC                 | DLSO | No | Initially, the patient received terbinafine 125 mg/day for 4 months, without improvement. Then, itraconazole 100 mg/day was prescribed for 2 months, but a little improvement was observed. Finally, pulse therapy with itraconazole 200 mg/day for 2 weeks (no medication for 2 weeks) was given. The treatment was carried out for 6 months | -                                                    | Achieved     | Achieved     |
| Summerbell et al., 2005       | FSSC                 | DLSO | -  | -                                                                                                                                                                                                                                                                                                                                             | -                                                    | -            | -            |
| Baran et al., 2004            | <i>Fusarium</i> spp. | SWO  | No | -                                                                                                                                                                                                                                                                                                                                             | -                                                    | -            | -            |
| Godoy et al., 2004            | FSSC                 | SWO  | -  | -                                                                                                                                                                                                                                                                                                                                             | -                                                    | -            | -            |
| Godoy et al., 2004            | FSSC                 | SWO  | -  | -                                                                                                                                                                                                                                                                                                                                             | -                                                    | -            | -            |
| Godoy et al., 2004            | FSSC                 | SWO  | -  | -                                                                                                                                                                                                                                                                                                                                             | -                                                    | -            | -            |
| Godoy et al., 2004            | FSSC                 | SWO  | -  | -                                                                                                                                                                                                                                                                                                                                             | -                                                    | -            | -            |
| Godoy et al., 2004            | FOSC                 | SWO  | -  | -                                                                                                                                                                                                                                                                                                                                             | -                                                    | -            | -            |
| Godoy et al., 2004            | FOSC                 | SWO  | -  | -                                                                                                                                                                                                                                                                                                                                             | -                                                    | -            | -            |

|                          |                      |      |                                                                                                                                                                   |                                                                       |                                                                   |                      |          |   |
|--------------------------|----------------------|------|-------------------------------------------------------------------------------------------------------------------------------------------------------------------|-----------------------------------------------------------------------|-------------------------------------------------------------------|----------------------|----------|---|
| Godoy et al., 2004       | FOSC                 | SWO  | -                                                                                                                                                                 | -                                                                     | -                                                                 | -                    | -        |   |
| Godoy et al., 2004       | FOSC                 | SWO  | -                                                                                                                                                                 | -                                                                     | -                                                                 | -                    | -        |   |
| Vella Zahra et al., 2003 | FOSC                 | -    | -                                                                                                                                                                 | -                                                                     | -                                                                 | -                    | -        |   |
| Vella Zahra et al., 2003 | FSSC                 | -    | -                                                                                                                                                                 | -                                                                     | -                                                                 | -                    | -        |   |
| Lee et al., 2002         | FSSC                 | -    | No                                                                                                                                                                | 3 months with 400 mg/day itraconazole for 7 days/months for 2 months. | -                                                                 | Not achieved         | -        |   |
| Tseng et al., 2000       | <i>Fusarium</i> spp. | TDO  | Econazole cream twice daily. After the mycological diagnosis, terbinafine cream twice daily for 4 weeks was prescribed. Lastly, fluconazole 100 mg/day was given. |                                                                       |                                                                   | Diluted clorox soaks | Achieved | - |
| Baran et al., 1997       | FOSC                 | -    | Yes                                                                                                                                                               | Topical bifonazole                                                    | Nail avulsion; Ciclopirox                                         | Achieved             | Achieved |   |
| Baran et al., 1997       | FOSC                 | PSO  | Yes                                                                                                                                                               | -                                                                     | 8% ciclopirox nail lacquer for 8 months and partial nail avulsion | Achieved             | Achieved |   |
| Baran et al., 1997       | FOSC                 | -    | Yes                                                                                                                                                               | -                                                                     | -                                                                 | -                    | -        |   |
| Gianni et al., 1997      | FOSC                 | TDO  | Yes                                                                                                                                                               | Itraconazole 200 mg/day for 3 months                                  | -                                                                 | -                    | -        |   |
| Gianni et al., 1997      | FOSC                 | DLSO | Yes                                                                                                                                                               | Terbinafine 250 mg/day for 3 months                                   | -                                                                 | Achieved             | -        |   |
| Gianni et al., 1997      | FOSC                 | -    | Yes                                                                                                                                                               | Itraconazole 200 mg/day for 3 months                                  | -                                                                 | Achieved             | -        |   |
| Gianni et al., 1997      | FOSC                 | SWO  | No                                                                                                                                                                | Terbinafine 250 mg/day for 3 months                                   | -                                                                 | Achieved             | -        |   |

DLSO: Distal and lateral subungual onychomycosis; PSO: Proximal subungual onychomycosis; TDO: Total dystrophic onychomycosis; SWO: Superficial white onychomycosis; Mycological cure: negative KOH and negative fungal culture; Clinical cure: appearance of completely normal-looking nail; - : Not described; FDSC: *Fusarium dimerum* species complex; FFSC: *Fusarium fujikuroi* species complex; FOSC: *Fusarium oxysporum* species complex; FSSC: *Fusarium solani* species complex.
